# Supplementary material
Source: Springer Nature journal article supplement (https://www.springermedizin.de/resource/supplementary/13063_2013_1560_MOESM2_ESM.pdf/9620300)
Supplement: MOESM2 [file 9620300]

### Step 1

- New referral received at hospital from GP and patient added to wait list within 3 days

### Step 2

- Medical triage within 5 days

### Step 3

- Hospital medical staff apply inclusion and exclusion criteria using the patient's GP referral

### Step 4

- Hospital research staff add potentially eligible patients' details to recruitment log sheet and database

### Step 5

- Hospital research staff recruit and verify eligibility by telephone and update recruitment database. Note: prioritising Category 1

### Step 6

- Hospital research staff e-mail or express post an *Information Package* (cover letter, patient information sheet and consent form) to patients based on verbal consent for participation

### Step 7

- If consent is not returned, hospital staff follow-up by e-mail or phone within 5 working days of sending the *Information Package*. Note: prioritising Category 1

### Step 8

- Signed consent form received and logged in recruitment database by hospital staff

### Step 9

- Randomisation and Study ID assigned

### Step 10

- Initial Appointment made
